# Supplementary material for: The human blood parasite Schistosoma mansoni expresses extracellular tegumental calpains that cleave the blood clotting protein fibronectin
Source: PubMed Central journal article supplement (PMC5635006; doi:10.1038/s41598-017-13141-5), 2017-10-10
Supplement: 41598_2017_13141_MOESM1_ESM.pdf [file 41598_2017_13141_MOESM1_ESM.pdf]

## **Supplementary Information**

Manuscript title: The human blood parasite *Schistosoma mansoni* expresses extracellular tegumental calpains that cleave the blood clotting protein fibronectin.

Author list: Qiang Wang, Akram A. Da'dara, Patrick J. Skelly

|         |                                                                |     |
|---------|----------------------------------------------------------------|-----|
| SmCalp1 | MG-RIQIVYSPD-----ENVSGRTNRPGKEVV-DPRTGRIIKVKRETPDDYLNVLKPIKG   | 53  |
| SmCalp2 | MQSNPTSNYSMENKLENLNICGNAFGYGHNSSSQYKLRDKTGYPPDTPQKYVNDMRTARH   | 60  |
| SmCalp1 | P-KRMEFNPYL---PKTLTPKGYAKF-----KLMMNVASKQYETLVKRLKTER          | 97  |
| SmCalp2 | NTRAMLFDPERSPLSSKVTENNYCRASPSVVRNPSTVFSVGGPSSSFEKIRQDLLNSG     | 120 |
| SmCalp1 | TLWEDPDFPANDKAIGNLPDFRERIIEWKRPHEINPNA-----KFFAGG              | 140 |
| SmCalp2 | HLFCDSAFPADDSSLYYSQRPPCQIVWMPRSEIIVAANSGGGSMGITPRKISTPEFIGEGG  | 180 |
| SmCalp1 | ASRFDIEQGALGDCWLLAVVASISGYPQLFDQVVPKDQELKGPEYVGVVRFWFWRFGHWV   | 200 |
| SmCalp2 | IKLGELELQGELGDCWVVAALAAIASQPSLLSRTIPTGQSFVVEWYAGIFAFRWFWRFGRWE | 240 |
| SmCalp1 | EVLIDDRLPVRQGRNTLVFEMHSNDPTEFWSALEKAYAKLNGCYAHLSSGGSQSEAMEDLT  | 260 |
| SmCalp2 | EVYIDDRLPVKSGGQP-LFVHSGRSTEFWPTLLEKAYAKLNGSYEALNVGLVGDAMDLLT   | 299 |
| SmCalp1 | GGICLSLELNQKER-----PSDLIDQLKIYAQRCCMLGCSIDSSVM---EQKMDNGLIGS   | 312 |
| SmCalp2 | GGLTESYTLPGAEDHGLQPPADLDDILIKSFDRLSLITARIKTKGVPGPGFVIVGVFVPG   | 359 |
| SmCalp1 | HAYSLTGVPVN----YRGRQWLMRLRNPWGD-SHEWKGAWCDGSPQWREISEQEKNI      | 367 |
| SmCalp2 | QAFGLTDCRKLRLTDASGSRLLRLVRLRLNLPWSVRVDWTGAWSEGSTEWLSLPPQDRLKV  | 419 |
| SmCalp1 | NLSFTADGEFWMSEDFVTCFSRVEVCHLGLLESLEY---NQNFHGKRRRLDEAIFSGQWQR  | 424 |
| SmCalp2 | GLV-KAQEEFWMSEDFIANFDYLDICHLLTEPPPVISKSSSAYHSIHNFPVHLLRGRWLR   | 478 |
| SmCalp1 | NVNAGGCINNRTTYWTSPQFRITVEDPDPDDDNKCSVLIGLMQTDIRKK--VGADFQPI    | 482 |
| SmCalp2 | GVSCGGRPYIRASHWANPQFRLVINSPEDEPDGFATTVIALMQADRRRLRHRAPRLASI    | 538 |
| SmCalp1 | GEMVYNAPDDLNTLLSRAQLLTRSPIAKS-QFINTREVTAQFRVPPGSYVVIPSTFDPNI   | 541 |
| SmCalp2 | GFVLYRLPAGANPPMPRGFFETNHHIASVDFEFDSREVVKRLKLTPGHYLLVPCITYAADQ  | 598 |
| SmCalp1 | EVNFILRVFSQTSI--TEQELDED-----NTNQGLPDDVIEALKLEDTLLDEDQIEQKF    | 594 |
| SmCalp2 | PGEFLRLLLFDNPDRIESTLERVELSGLAATGPEPDPNYELFQ-----PRLRRLF        | 649 |
| SmCalp1 | LAIRDPKTNAINAVKLGELLNSTLQ-DIPNFQGFNKELCRSMVASVDNNLTGHVELNEF    | 653 |
| SmCalp2 | Y-EASGESMAVDAFQLEPIILNCLLRDDHRAPYSMVSTDACRSEVALLDRDGTGRLCESDF  | 708 |
|         | 1                                                              | 2   |
| SmCalp1 | MDIWIQAKGWKHIFIKHDVDQSGYFSAYEFREALNDAGYHVSNRLINAIINRYQDPGTDK   | 713 |
| SmCalp2 | RRVWDILRSWSRLFASFDPORTAHVTSLDFRIIVEQAGYTLPHTLFSKLVNRFVNVDW-R   | 767 |
|         | 3                                                              | 4   |

|         |                                                                                           |     |
|---------|-------------------------------------------------------------------------------------------|-----|
| SmCalp1 | I S F E D F M L C M V R L K T A F E T I E A H P K N I E G T S L F S A E D Y L R F S V Y I | 758 |
| SmCalp2 | L D Y P H F I S A M S L I T K A V A I F K N - - F D H G G R A V L P L E Q F V E I A M T M | 810 |

5

**Supplementary figure S1: Alignment of the predicted amino acid sequences of SmCalp1 and SmCalp2 using CLUSTAL.** Dashes indicate gaps introduced to maximize matching. Identical amino acids are white on a black background. The catalytic domain (PC1 and PC2), CBSW domain and EF hand domain are indicated with grey (PC1), red (PC2), light blue and green boxes, respectively, corresponding to the diagram in figure 1C. Indicated in red are conserved catalytic residues (C<sup>154</sup>, H<sup>313</sup> and N<sup>337</sup> in SmCalp1 and C<sup>194</sup>, Q<sup>330</sup> and N<sup>296</sup> in SmCalp2). The numbers (1 – 5) below the alignment at the carboxyl end indicate the five EF hand motifs.

|         |                                                                 |     |
|---------|-----------------------------------------------------------------|-----|
| SmCalp2 | -----M QSNPTS NYSM                                              | 11  |
| SjCalp2 | -----M QSNQLL NDSL                                              | 11  |
| ShCalp2 | -----M QSNLPL NCSL                                              | 11  |
| CsCalp2 | MSVSYDPSALS LANLIESPTVPTKSKAMATSRPQVTGLVPGLFESQAALIH SNTKSFY-T  | 59  |
| EgCalp2 | -----M N-----T                                                  | 3   |
|         |                                                                 |     |
| SmCalp2 | ENKLEENLNICGNAFG-----YGHN-SSSQYKLRDKTGYPDP TPQKYVNDMRTARHNTR    | 63  |
| SjCalp2 | ENKLEHLNVCGDDFG-----YSHN-SNSQYRLRDKTGYPDP TPQRYVNDMQTARHNTR     | 63  |
| ShCalp2 | ENKLEENLNLCGNSFG-----YGHN-SSSQYKLRDKTGYPDP TPQKYVNDMKTARHNTR    | 63  |
| CsCalp2 | EKEISNILKTVRDMGEVQKLISIAQNSSGADTPLRTVND FQNRITPTALMNDLEIE-----  | 114 |
| EgCalp2 | NRS L-----KISNSSLNKIGDY PPLRAVSNAN---FGR ISET                   | 37  |
|         |                                                                 |     |
| SmCalp2 | AMLFDPERSPLSSKVTENNYCRASPS PVV--NRPSTVFSFVGGPSSSFEKIRQDLLNSGH   | 121 |
| SjCalp2 | TMMFDSNIGSLSPKVAENNYCRSSPS PMVA-NRPSTVFSFVGGPSSSFEKIRQELLHSGH   | 122 |
| ShCalp2 | AMLFDSERGPLSPKATENNYCRASPS PMV--NRPSTVFSFVGGPSSSFEKIRQDLLQSGH   | 121 |
| CsCalp2 | ----NRSKSPMHLNLSASNMCRASPS PSMVMSENNANFI PAGGASSTFEKLRTEALRS GH | 170 |
| EgCalp2 | DDIFRVSADGQTRFLN---DSGRDSSQMIHDVGPST--KTLPI PSESEFEQIRTEHKMLGR  | 92  |
|         |                                                                 |     |
| SmCalp2 | LFCDSAFPADDSSLYYSQRPPCQIVWMRPSEIVAANS GGGSMGITPRKISTPEFIGEGGI   | 181 |
| SjCalp2 | LFCDSAFPADDSSLYYSQRPPCHIVWMRPSEIVAANS GGGSMGITPRRISTPEFIGEGGI   | 182 |
| ShCalp2 | LFCDSAFPADDSSLYYSQRPPCQIVWMRPSEIVAANS GGGSMGITPRKISTPEFIGEGGI   | 181 |
| CsCalp2 | FYS DATFPADDSSLYYSQRPPCHIVWMRPSEIVA AQS GGGLVGIAPRKMSLPEFISEGGA | 230 |
| EgCalp2 | LFCDSAFPADETS LYYSRRPPCSIVWMRPPEIVS AMCRTDVLGIAPRKIHFP EFIAGGSI | 152 |
|         |                                                                 |     |
| SmCalp2 | KLGE LRQGELGDCWVVAALAAIASQPSLLSRTIPTGQSFRVEWYAGIFAFRFRWFRGWEE   | 241 |
| SjCalp2 | KLSELRQGEL-DCWVVAALAAIASQPSLLSRTIPTGQSFRVEWYAGIFAFRFRWFRGWEE    | 241 |
| ShCalp2 | KLGE LRQGELGDCWVVAALAAIAGQPSLLSRTIPTGQSFRVEWYAGIFAFRFRWFRGWEE   | 241 |
| CsCalp2 | KLGE LRQGELGDCWVVAALAAISSQPNLLSRTIPV GQSFRPEWYAGIFAFRFRWFRGHWEE | 290 |
| EgCalp2 | RLGDLRQGELGDCWVVAALASMTVTPRLTMRSI POGQSFR AEWYAGCFCFRFRWQFGAWEE | 212 |
|         |                                                                 |     |
| SmCalp2 | VYIDDRLPVKSGGQPLFVHSGRSTEFWPTLLEKAYAKLNGSYEALNVGLVGDAMDDLTGG    | 301 |
| SjCalp2 | VYIDDRLPVRS GGQPLFVHSGRLNEFWPTLLEKAYAKLNGSYEALNVGLVGDAMDDLTGG   | 301 |
| ShCalp2 | VYIDDRLPVKSGGQPLFVHSGRLTEFWPTLLEKAYAKLNGSYEALNVGLVGDAMDDLTGG    | 301 |
| CsCalp2 | VIIDDRIPVRP GGQPLFVHSGRMTEFWPALLEKAYAKLNGSYEALNVGLVGDAMDDLTGG   | 350 |
| EgCalp2 | VIIDDRLPVRP GGRPLFIHSSRHTEFWPALLEKAYAKLSGSYEALNVGLIGDAMDDIIGG   | 272 |
|         |                                                                 |     |
| SmCalp2 | LTESYILPGAEDHGLQPPADLDDILIKSFDRRSLITARIKT-----                  | 342 |
| SjCalp2 | LTESYILPGAEEQGLQPPSDLDDILIKSFDRRSLITA-----                      | 338 |
| ShCalp2 | LTESYILPGAEDHGLQPPSDLDDILIKSFDRRSLITARIKT-----                  | 342 |
| CsCalp2 | LTESYILPAAEEQGILPPPALDDILIKSFDRRSLITARIKV-----                  | 391 |
| EgCalp2 | LTESYCLAPGEDQGRPPPDLDDILIKAFDRRSLITARIKASASSSLSGISPSSRLFALT     | 332 |
|         |                                                                 |     |
| SmCalp2 | -----KGVPGPGFVIVPGFVPGQAFGLTDCRKLRLTDASGSRLLRVLRLRN LWPSVRVD    | 396 |
| SjCalp2 | -----PPGPGFVIPAGFVPGQAFGLTDCRKLRLTDASGSRLLRVLRLRN LWPSVRVD      | 390 |
| ShCalp2 | -----KGVPGPGFVIVPGFVPGQAFGLTDCRKLRLTDASGSRLLRVLRLRN LWPSVRVD    | 396 |
| CsCalp2 | -----S-IPGPGFVIVPGFVPGQAFGLTDCRKLRLTDATGSRLVRLVRLRN LWPSVRVG    | 444 |
| EgCalp2 | ALHRRTKGSPCSGFVLPQGFVPGQAFGLTDCRKLRLTDVSGSRLVRLVRLRN LWPSARVG   | 392 |

|         |                                                                |     |
|---------|----------------------------------------------------------------|-----|
| SmCalp2 | WTGAWSEGSTTEWLSLPPQDRLEKVGLVKAQEEFWMSLEDFIANFDYLDICHLTEPPPVISK | 456 |
| SjCalp2 | WTGAWSEGSTTEWLSLPPQDRLEKVGLVKAQEEFWMSIEDFVANFDYLDICHLTEPPPVISK | 450 |
| ShCalp2 | WTGAWSEGSTTEWLSLPPQDRLEKVGLVKAQEEFWMSLEDFIANFDYLDICHLTEPPPVISK | 456 |
| CsCalp2 | WTGAWSEGSNEWLSLPAQDRLEKVGLVKSDDDEFWMSLEDFIANFDYLDICHLTEPAPPTPS | 504 |
| EgCalp2 | WVGAWSEGSSEWLSLPPEDRIKVGLVKGEGEFWMSMEDFLANFDYLDICHVLEPPSGDAG   | 452 |

|         |                                                                |     |
|---------|----------------------------------------------------------------|-----|
| SmCalp2 | SSSA-----YHSLHNFPSVHLRGRWLRGVSCGGRPYIRASHWANPQFRIV             | 501 |
| SjCalp2 | PSNA-----YHSTYHFPSVHLRGRWLRGVSCGGRPYIRASHWANPQFRIG             | 495 |
| ShCalp2 | SSSA-----YHSLHNFPSVHLRGRWLRGVSCGGRPYIRASHWANPQFRIV             | 501 |
| CsCalp2 | SPTP-----IQTMPNFPAAHLRGRWLRGVSCGGRPYIRTSHWANPQFRIL             | 549 |
| EgCalp2 | GGRLFCGTVATTGNHQAPVGPAMETWTTPRFEGRWVRGVVTAGGRPFVRAASHWANPQFVVS | 512 |

|         |                                                               |     |
|---------|---------------------------------------------------------------|-----|
| SmCalp2 | INSPDPNDPDGEATTVIALMQADRRRLRHRAPRLASIGFVLYRLPAGANPPMPPRGFFETN | 561 |
| SjCalp2 | INSPDPTDPEGLATTVIALMQADRRRLRHRAPRLASIGFVLYRLPSGANPPMPPRGFFETN | 555 |
| ShCalp2 | INSPDPNDLDGEATTVIALMQADRRRLRHRAPRLASIGFVLYRLPAGANPPMPPRGFFETN | 561 |
| CsCalp2 | IGSADPNDDGLAAVVIALMQADRRRLRHRAPRLASIGFVLYRLPAGSHPPMPRAFFESN   | 609 |
| EgCalp2 | LPTPDVGDPEGLTAVVALLQSDVRPLRHRAPRLLSIGFVLYRLPPGASPPMTRHFFETIT  | 572 |

|         |                                                               |     |
|---------|---------------------------------------------------------------|-----|
| SmCalp2 | HHIASVDFFFDSREVVKRIKLTTPGHYLLVPCTYAADQPGEFLLRLLFDNPDRICESTLER | 621 |
| SjCalp2 | HHIASVDFFFDSREVVKRIKLTTPGHYLLVPCTYAADQPGEFLLRLLFDHPDRICEPTLER | 615 |
| ShCalp2 | HHIASVDFFFDSREVVKRIKLTTPGHYLLVPCTYAADQPGEFLLRLLFDNPDRICESTLER | 621 |
| CsCalp2 | HHVASVDFFFDSREVVKRIKLTTPGHYLLVPCTYAPDQPGEFLLRILFDQADRSCPALER  | 669 |
| EgCalp2 | SHVASVDYFYDSREVVKRFRLVPGVYLLVPCTYAADQPGEFLLRVLFEQSDRTLELALGP  | 632 |

|         |                                                               |     |
|---------|---------------------------------------------------------------|-----|
| SmCalp2 | VELSGLAA--TGPELDPNYELFQPRIRRLRYEASGESMAVDAFQLEPILNCLLRDDHRAPY | 680 |
| SjCalp2 | VELSGLAA--TGPELDPNYELFQPRIRRLRYEASGESMAVDAFQLEPILNCLLRDDHRAPY | 674 |
| ShCalp2 | VELSGLAA--TGPELDPNYELFQPRIRRLRYEASGESMAVDAFQLEPILNCLLRDDHRAPY | 680 |
| CsCalp2 | VELSGLAA--NGPESDSQLELIKPRIRRLRYEASGEFAMVDAFQLEPILNSLLRDDHRSPY | 728 |
| EgCalp2 | IDAGSISPQALSDDPQFDITLPRIRRLRYEASGDSMAVDAFQLDSILNTLLKEDHRLPY   | 692 |

1

|         |                                                               |     |
|---------|---------------------------------------------------------------|-----|
| SmCalp2 | SMVSTDACRSLVALLDRDGTGRLCESDFRRVWDILRSWSRLEFASFDPQRTAHVTSLDFRI | 740 |
| SjCalp2 | NMVSTDACRSLVALLDRDGTGRLCESDFRRVWDILRSWSRLEFASFDPQRTAHVTSLDFRI | 734 |
| ShCalp2 | SMVSTDACRSLVALLDRDGTGRLCESDFRRVWDILRSWSRLEFASFDPQRTAHVTSLDFRI | 740 |
| CsCalp2 | TVVTTDACRALVALLDRDGTGRLSESDFHRVWDILRCWSRLEFAAFDPQRTGHVTSLDFRI | 788 |
| EgCalp2 | ANVSTDACRALIAMRNDRYTGRLVESEFQPTWSSLRCWSRMEFAAFDPQRTGHITCLDFRI | 752 |

2

3

|         |                                                                |     |
|---------|----------------------------------------------------------------|-----|
| SmCalp2 | IVEQAGYTLPHITLFSKLVNRFVNVDRWLDYPHFISAMSLITKAVAIKKNFDHGGRAV-LP  | 799 |
| SjCalp2 | IVEQAGYTLPHITLFSKLVHRFVNVDRWLDYPHFISAMSLITKAVAIKKNFDHGGRAV-LP  | 793 |
| ShCalp2 | IVEQAGYTLPHITLFSKLVNRFVNVDRWLDYPHFISAMSLITKAVAIKKNFDHGGRAV-LP  | 799 |
| CsCalp2 | IVEQAGYTLPHSILSRMVHRFVDVDRWLDYSKFINAMALITKTIKAIKKNYDHHGGRAV-LS | 847 |
| EgCalp2 | LIEQVGLYLPHITLARIVHREADAERWISYGTFIQIMALLTRAISTFNAESGDGLTLIIH   | 812 |

4

5

|         |             |     |
|---------|-------------|-----|
| SmCalp2 | LEQFVEIAMTM | 810 |
| SjCalp2 | LEQFVEIALTM | 804 |
| ShCalp2 | LEQFVEIAMTM | 810 |
| CsCalp2 | LEQ-----    | 850 |
| EgCalp2 | LEEYLEALTII | 823 |

**Supplementary figure S2: Alignment of the predicted amino acid sequences of the platyhelminth Calp2 clade 2 proteins using CLUSTAL.** Dashes indicate gaps introduced to maximize alignment. Amino acids identical in all five sequences are depicted in white with a black background, amino acids found in 4/5 have a grey background and in 3/5 have a light grey background. The catalytic domain (PC1 and PC2), CBSW domain and EF hand domain are indicated with grey (PC1), red (PC2), blue and green boxes, respectively. Red amino acids indicate conserved catalytic residues. The numbers (1 – 5) below the alignment at the carboxyl end indicate the five EF hand motifs. SmCalp2, *S. mansoni* Calp2 (SmCalp2; MF590064); SjCalp2, *S. japonicum* Calp2 (SjCalp2, MF590065); ShCalp2, *S. haematobium* Calp2 (ShCalp2, XP\_012791984) CsCalp2, *Clonorchis sinensis* Calp2 (Cs2, GAA29557.2); EgCalp2, *Echinococcus granulosus* Calp2 (Eg2, CDS20315.1).

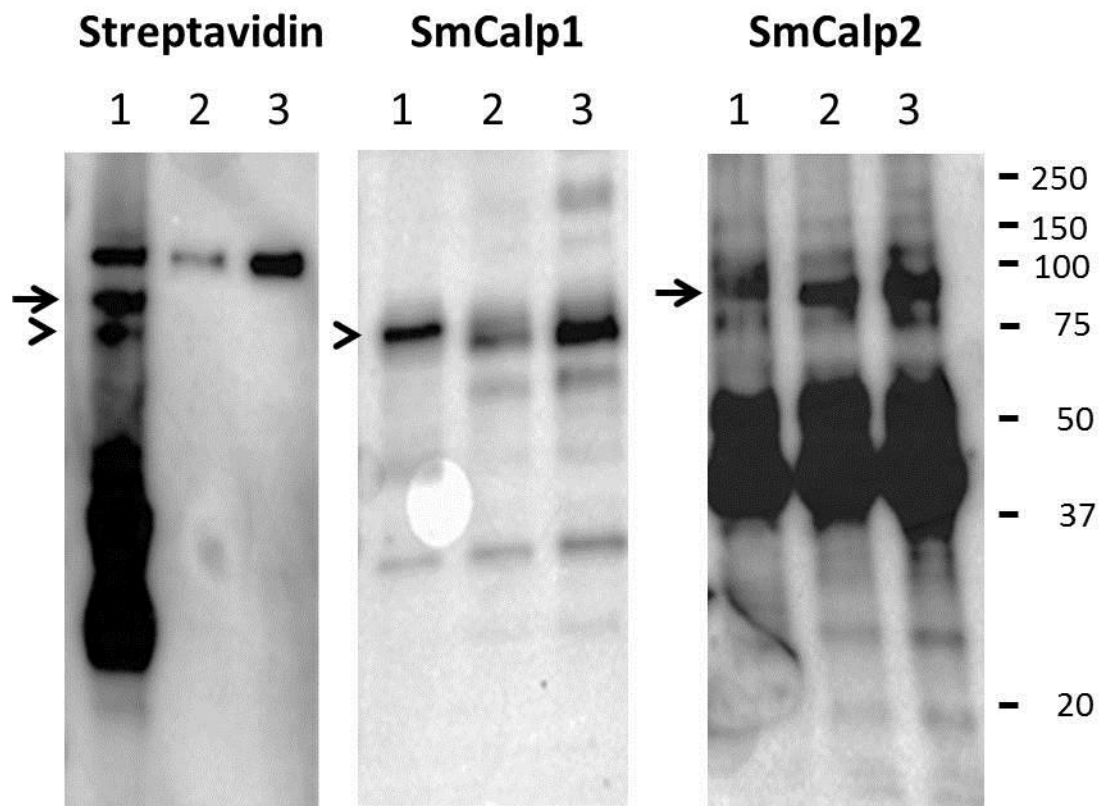

**Supplementary figure S3: The entire blot from figure 6C - western blot analysis of extracts of adult worms exposed to biotinylated E64c (lanes 1), E64c (lanes 2) or untreated control (lanes 3) worms.** The blot was probed with streptavidin-HRP, (left panel) to detect biotinylated proteins or with anti-SmCalp1 antibody (center) to detect SmCalp1 or with anti-SmCalp2 antibody (right panel) to detect SmCalp2. Blots were then probed with HRP-labeled secondary anti-antibody. Lanes 1 contain extracts of biotinylated E64c-treated worms, lanes 2 contain extracts of E64c-treated worms, lanes 3 contain extracts of untreated, control worms, The arrowhead indicates the position of migration of SmCalp1 and the arrow indicates the position of migration of SmCalp2. A non-specific streptavidin binding protein is detected at the top of all lanes in the “Streptavidin” panel (left). Some of the additional lower molecular weight, biotinylated moieties seen in “Streptavidin” lane 1 (left) may represent biotinylated SmCalp2 fragments, also detected by the anti-SmCalp2 antibody in “SmCalp2” lanes 1, 2 and 3 (right panel).
